# Supplementary material
Source: PubMed Central journal article supplement (PMC9255931)
Supplement: gbab164_suppl_supplementary_appendix.pdf [file gbab164_suppl_supplementary_appendix.pdf]

## Appendix.

**Table A1. Descriptive statistics of sample by care arrangement before limiting sample, person-years.**

|                           | No care  |           | <500hours,<br>nonresidential care |          | 499>hours,<br>nonresidential care |           | Any care,<br>multigenerational HH |          | Any care, skipped-<br>generation HH |          |
|---------------------------|----------|-----------|-----------------------------------|----------|-----------------------------------|-----------|-----------------------------------|----------|-------------------------------------|----------|
|                           | Mean     | SD        | Mean                              | SD       | Mean                              | SD        | Mean                              | SD       | Mean                                | SD       |
| Mental Health (0-8)       | 6.47     | 2.01      | 6.87                              | 1.75     | 6.84                              | 1.75      | 5.99                              | 2.27     | 6.05                                | 2.26     |
| Women (%)                 | 58.89    |           | 56.68                             |          | 58.25                             |           | 65.92                             |          | 62.94                               |          |
| Social Engagement (0-4)   | 1.51     | 0.92      | 1.80                              | 0.87     | 1.84                              | 0.87      | 1.35                              | 0.90     | 1.51                                | 0.91     |
| Sees Kids Weekly          | 2.90     |           | 2.46                              |          | 2.98                              |           | 0.00                              |          | 1.93                                |          |
| Working (%)               | 28.91    |           | 31.93                             |          | 32.25                             |           | 38.05                             |          | 28.97                               |          |
| Any dependents (%)        | 12.55    |           | 4.02                              |          | 6.78                              |           | 35.47                             |          | 41.87                               |          |
| Self-reported health      | 2.09     | 1.12      | 2.40                              | 1.03     | 2.31                              | 1.03      | 1.82                              | 1.10     | 1.91                                | 1.10     |
| ADLS (0-5)                | 0.41     | 1.04      | 0.15                              | 0.58     | 0.17                              | 0.60      | 0.39                              | 0.93     | 0.43                                | 1.00     |
| IADLS (0-3)               | 0.19     | 0.60      | 0.06                              | 0.31     | 0.06                              | 0.28      | 0.14                              | 0.48     | 0.15                                | 0.49     |
| Health Conditions (0-8)   | 2.04     | 1.48      | 1.84                              | 1.34     | 1.86                              | 1.37      | 2.12                              | 1.55     | 2.24                                | 1.54     |
| Household Income (\$)     | 61822.85 | 225957.30 | 78203.61                          | 94643.31 | 91527.92                          | 689551.80 | 44300.99                          | 59447.02 | 49593.57                            | 55526.22 |
| Age at first wave (years) | 67.74    | 11.49     | 65.22                             | 7.86     | 64.54                             | 7.67      | 61.90                             | 8.74     | 65.01                               | 8.60     |
| N                         | 97,369   |           | 4,880                             |          | 2,788                             |           | 1,737                             |          | 1,298                               |          |

Notes: Units of analysis are person-years. Descriptive statistics here show person-years before limiting the sample to grandparents without missing values and who are observed only once. Statistics are shown by care arrangement in the previous two years: No grandchild care provided; Less than 500 hours of nonresidential care (in which the grandchild does not reside with the grandparent); More than 500 hours of residential care; Any amount of care in a multigenerational household (in which the grandparent lives with both their child and grandchild); and Any amount of residential care in a skipped-generation household (in which the grandparent lives with only the grandchild).

**Table A2. Descriptive statistics of sample by care arrangement, individuals.**

|                            | No care   |           | <500hours,<br>nonresidential care |           | 499>hours,<br>nonresidential care |           | Any care,<br>multigenerational HH |           | Any care, skipped-<br>generation HH |           |
|----------------------------|-----------|-----------|-----------------------------------|-----------|-----------------------------------|-----------|-----------------------------------|-----------|-------------------------------------|-----------|
|                            | Mean      | SD        | Mean                              | SD        | Mean                              | SD        | Mean                              | SD        | Mean                                | SD        |
| Mental Health (0-8)        | 6.41      | 2.03      | 6.78                              | 1.83      | 6.62                              | 1.86      | 5.98                              | 2.12      | 5.72                                | 2.39      |
| Women (%)                  | 60.12     |           | 57.97                             |           | 61.74                             |           | 66.56                             |           | 61.32                               |           |
| Social Engagement (0-4)    | 1.60      | 0.89      | 1.82                              | 0.88      | 1.84                              | 0.90      | 1.51                              | 0.94      | 1.54                                | 0.90      |
| Sees Kids Weekly (%)       | 2.51      |           | 4.76                              |           | 6.25                              |           | 0.00                              |           | 2.83                                |           |
| Working (%)                | 34.81     |           | 38.28                             |           | 42.53                             |           | 55.52                             |           | 42.92                               |           |
| Any dependents (%)         | 13.13     |           | 5.04                              |           | 10.98                             |           | 44.81                             |           | 50.47                               |           |
| Self-reported health (0-4) | 2.16      | 1.11      | 2.44                              | 1.06      | 2.28                              | 1.08      | 1.87                              | 1.10      | 1.88                                | 1.07      |
| ADLS (0-5)                 | 0.26      | 0.76      | 0.14                              | 0.55      | 0.16                              | 0.56      | 0.39                              | 0.86      | 0.50                                | 1.14      |
| IADLS (0-3)                | 0.08      | 0.35      | 0.04                              | 0.21      | 0.05                              | 0.23      | 0.12                              | 0.43      | 0.17                                | 0.51      |
| Health Conditions (0-8)    | 1.71      | 1.35      | 1.50                              | 1.22      | 1.69                              | 1.35      | 1.64                              | 1.42      | 2.02                                | 1.54      |
| Household Income (\$)      | 55,539.08 | 77,844.02 | 77,389.38                         | 98,886.39 | 62,174.30                         | 62,145.70 | 47,856.73                         | 50,544.16 | 51,390.33                           | 57,600.54 |
| Age at first wave (years)  | 64.30     | 10.57     | 62.68                             | 8.38      | 61.25                             | 7.91      | 56.19                             | 6.93      | 60.20                               | 8.20      |
| N                          | 16,115    |           | 1,092                             |           | 656                               |           | 308                               |           | 212                                 |           |

Notes: Units of analysis are individuals. Descriptive statistics reflect measures at individuals' first observation.

**Table A3. Multivariate fixed effects models predicting mental health values for all grandparents, grandmothers, and grandfathers, all covariates.**

|                                                     | All       |           | Women     |           | Men       |           |
|-----------------------------------------------------|-----------|-----------|-----------|-----------|-----------|-----------|
|                                                     | (1)       | (2)       | (3)       | (4)       | (5)       | (6)       |
| <500hours care, nonresidential                      | 0.041+    | 0.041+    | 0.041     | 0.041     | 0.04      | 0.041     |
|                                                     | (0.02)    | (0.02)    | (0.03)    | (0.03)    | (0.03)    | (0.03)    |
| 499>hours, nonresidential                           | 0.062*    | 0.062*    | 0.075+    | 0.075+    | 0.04      | 0.039     |
|                                                     | (0.03)    | (0.03)    | (0.04)    | (0.04)    | (0.04)    | (0.04)    |
| Any care, multigenerational HH                      | -0.029    | -0.03     | -0.036    | -0.036    | -0.008    | -0.01     |
|                                                     | (0.05)    | (0.05)    | (0.07)    | (0.07)    | (0.08)    | (0.08)    |
| Any care, skipped-generation HH                     | -0.146*   | -0.145*   | -0.106    | -0.103    | -0.221*   | -0.223*   |
|                                                     | (0.06)    | (0.06)    | (0.08)    | (0.08)    | (0.09)    | (0.09)    |
| Social Engagement                                   | 0.126***  | 0.126***  | 0.125***  | 0.125***  | 0.129***  | 0.129***  |
|                                                     | (0.01)    | (0.01)    | (0.01)    | (0.01)    | (0.02)    | (0.02)    |
| Social Engagement * Any care, skipped-generation HH |           | 0.315*    |           | 0.306+    |           | 0.342     |
|                                                     |           | (0.14)    |           | (0.16)    |           | (0.24)    |
| Sees Kids Weekly                                    | 0.027     | 0.026     | 0.037     | 0.036     | 0.003     | 0.003     |
|                                                     | (0.05)    | (0.05)    | (0.07)    | (0.07)    | (0.09)    | (0.09)    |
| Working                                             | 0.080***  | 0.079***  | 0.089**   | 0.088**   | 0.061+    | 0.061+    |
|                                                     | (0.02)    | (0.02)    | (0.03)    | (0.03)    | (0.03)    | (0.03)    |
| Any Dependents                                      | -0.048+   | -0.048+   | -0.056    | -0.057    | -0.033    | -0.033    |
|                                                     | (0.03)    | (0.03)    | (0.03)    | (0.03)    | (0.04)    | (0.04)    |
| Self-Reported Health                                | 0.266***  | 0.266***  | 0.304***  | 0.304***  | 0.208***  | 0.208***  |
|                                                     | (0.01)    | (0.01)    | (0.01)    | (0.01)    | (0.01)    | (0.01)    |
| ADLs                                                | -0.245*** | -0.245*** | -0.231*** | -0.231*** | -0.270*** | -0.270*** |
|                                                     | (0.01)    | (0.01)    | (0.02)    | (0.02)    | (0.02)    | (0.02)    |
| IADLS                                               | -0.164*** | -0.164*** | -0.147*** | -0.147*** | -0.193*** | -0.193*** |
|                                                     | (0.02)    | (0.02)    | (0.03)    | (0.03)    | (0.04)    | (0.04)    |
| Chronic Health Conditions                           | -0.072*** | -0.072*** | -0.056**  | -0.056**  | -0.093*** | -0.093*** |
|                                                     | (0.01)    | (0.01)    | (0.02)    | (0.02)    | (0.02)    | (0.02)    |
| Income (Logged)                                     | 0.054***  | 0.054***  | 0.060***  | 0.060***  | 0.044**   | 0.044**   |
|                                                     | (0.01)    | (0.01)    | (0.01)    | (0.01)    | (0.02)    | (0.02)    |
| Age (ref: <60)                                      |           |           |           |           |           |           |
| 60-64                                               | 0.057+    | 0.058+    | 0.054     | 0.054     | 0.066     | 0.067     |
|                                                     | (0.03)    | (0.03)    | (0.04)    | (0.04)    | (0.04)    | (0.04)    |
| 65-69                                               | 0.119**   | 0.120**   | 0.103+    | 0.104+    | 0.150*    | 0.151*    |

|              |          |          |          |          |          |          |
|--------------|----------|----------|----------|----------|----------|----------|
|              | (0.04)   | (0.04)   | (0.06)   | (0.06)   | (0.06)   | (0.06)   |
| 70-74        | 0.091    | 0.092    | 0.087    | 0.089    | 0.112    | 0.113    |
|              | (0.06)   | (0.06)   | (0.07)   | (0.07)   | (0.08)   | (0.08)   |
| 75-79        | 0.01     | 0.011    | 0.006    | 0.007    | 0.042    | 0.042    |
|              | (0.07)   | (0.07)   | (0.09)   | (0.09)   | (0.10)   | (0.10)   |
| 80-84        | -0.073   | -0.072   | -0.032   | -0.031   | -0.093   | -0.092   |
|              | (0.08)   | (0.08)   | (0.11)   | (0.11)   | (0.12)   | (0.12)   |
| 85+          | -0.204*  | -0.203*  | -0.12    | -0.118   | -0.287+  | -0.285+  |
|              | (0.10)   | (0.10)   | (0.14)   | (0.14)   | (0.15)   | (0.15)   |
| 2004         | 0.093*** | 0.092*** | 0.098*** | 0.098*** | 0.076**  | 0.076**  |
|              | (0.02)   | (0.02)   | (0.02)   | (0.02)   | (0.03)   | (0.03)   |
| 2006         | 0.103*** | 0.102*** | 0.103*** | 0.102*** | 0.091**  | 0.091**  |
|              | (0.02)   | (0.02)   | (0.03)   | (0.03)   | (0.03)   | (0.03)   |
| 2008         | 0.198*** | 0.197*** | 0.224*** | 0.223*** | 0.141*** | 0.140*** |
|              | (0.03)   | (0.03)   | (0.04)   | (0.04)   | (0.04)   | (0.04)   |
| 2010         | 0.244*** | 0.244*** | 0.252*** | 0.251*** | 0.212*** | 0.212*** |
|              | (0.03)   | (0.03)   | (0.04)   | (0.04)   | (0.05)   | (0.05)   |
| 2012         | 0.242*** | 0.241*** | 0.261*** | 0.260*** | 0.192*** | 0.191*** |
|              | (0.04)   | (0.04)   | (0.05)   | (0.05)   | (0.06)   | (0.06)   |
| Constant     | 5.416*** | 5.416*** | 5.064*** | 5.064*** | 5.972*** | 5.970*** |
|              | (0.12)   | (0.12)   | (0.15)   | (0.15)   | (0.17)   | (0.17)   |
| Observations | 75,929   | 75,929   | 46,708   | 46,708   | 29,221   | 29,221   |

Notes: Social engagement and childcare variables are demeaned.

**Table A4. Multivariate fixed effects models predicting mental health values for all grandparents, grandmothers, and grandfathers, all interactions.**

|                                                      | All      |          |          |          |          | Women    |          |          |          |          | Men      |          |          |          |          |
|------------------------------------------------------|----------|----------|----------|----------|----------|----------|----------|----------|----------|----------|----------|----------|----------|----------|----------|
|                                                      | (1)      | (2)      | (3)      | (4)      | (5)      | (6)      | (7)      | (8)      | (9)      | (10)     | (11)     | (12)     | (13)     | (14)     | (15)     |
| <500hours care, nonresidential                       | 0.041+   | 0.041+   | 0.041+   | 0.041+   | 0.041+   | 0.041    | 0.041    | 0.041    | 0.041    | 0.041    | 0.04     | 0.04     | 0.041    | 0.04     | 0.041    |
|                                                      | (0.02)   | (0.02)   | (0.02)   | (0.02)   | (0.02)   | (0.03)   | (0.03)   | (0.03)   | (0.03)   | (0.03)   | (0.03)   | (0.03)   | (0.03)   | (0.03)   | (0.03)   |
| 499>hours, nonresidential                            | 0.062*   | 0.062*   | 0.062*   | 0.062*   | 0.062*   | 0.075+   | 0.075+   | 0.074+   | 0.075+   | 0.075+   | 0.04     | 0.04     | 0.041    | 0.039    | 0.039    |
|                                                      | (0.03)   | (0.03)   | (0.03)   | (0.03)   | (0.03)   | (0.04)   | (0.04)   | (0.04)   | (0.04)   | (0.04)   | (0.04)   | (0.04)   | (0.04)   | (0.04)   | (0.04)   |
| Any care, multigenerational HH                       | -0.029   | -0.029   | -0.029   | -0.034   | -0.03    | -0.036   | -0.036   | -0.036   | -0.041   | -0.036   | -0.008   | -0.008   | -0.008   | -0.013   | -0.01    |
|                                                      | (0.05)   | (0.05)   | (0.05)   | (0.05)   | (0.05)   | (0.07)   | (0.07)   | (0.07)   | (0.07)   | (0.07)   | (0.08)   | (0.08)   | (0.08)   | (0.08)   | (0.08)   |
| Any care, skipped-gen HH                             | -0.146*  | -0.146*  | -0.146*  | -0.146*  | -0.145*  | -0.106   | -0.106   | -0.106   | -0.106   | -0.103   | -0.221*  | -0.221*  | -0.220*  | -0.219*  | -0.223*  |
|                                                      | (0.06)   | (0.06)   | (0.06)   | (0.06)   | (0.06)   | (0.08)   | (0.08)   | (0.08)   | (0.08)   | (0.08)   | (0.09)   | (0.09)   | (0.09)   | (0.09)   | (0.09)   |
| Social Engagement                                    | 0.126*** | 0.126*** | 0.126*** | 0.126*** | 0.126*** | 0.125*** | 0.125*** | 0.125*** | 0.125*** | 0.125*** | 0.129*** | 0.129*** | 0.128*** | 0.129*** | 0.129*** |
|                                                      | (0.01)   | (0.01)   | (0.01)   | (0.01)   | (0.01)   | (0.01)   | (0.01)   | (0.01)   | (0.01)   | (0.01)   | (0.02)   | (0.02)   | (0.02)   | (0.02)   | (0.02)   |
| Social Engagement * <500hours care, nonresidential   |          | 0.002    |          |          |          |          | 0.005    |          |          |          |          | -0.003   |          |          |          |
|                                                      |          | (0.05)   |          |          |          |          | (0.07)   |          |          |          |          | (0.08)   |          |          |          |
| Social Engagement * 499>hours, nonresidential        |          |          | -0.02    |          |          |          |          | 0.046    |          |          |          |          | -0.126   |          |          |
|                                                      |          |          | (0.07)   |          |          |          |          | (0.10)   |          |          |          |          | (0.11)   |          |          |
| Social Engagement , * Any care, multigenerational HH |          |          |          | -0.178   |          |          |          |          |          | -0.142   |          |          |          | -0.276   |          |
|                                                      |          |          |          | (0.12)   |          |          |          |          |          | (0.14)   |          |          |          | (0.21)   |          |
| Social Engagement * Any care, skipped-gen HH         |          |          |          |          | 0.315*   |          |          |          |          | 0.306+   |          |          |          |          | 0.342    |
|                                                      |          |          |          |          | (0.14)   |          |          |          |          | (0.16)   |          |          |          |          | (0.24)   |
| Sees Kids Weekly                                     | 0.027    | 0.027    | 0.027    | 0.027    | 0.026    | 0.037    | 0.037    | 0.037    | 0.037    | 0.036    | 0.003    | 0.003    | 0.004    | 0.004    | 0.003    |
|                                                      | (0.05)   | (0.05)   | (0.05)   | (0.05)   | (0.05)   | (0.07)   | (0.07)   | (0.07)   | (0.07)   | (0.07)   | (0.09)   | (0.09)   | (0.09)   | (0.09)   | (0.09)   |
| Working                                              | 0.080*** | 0.080*** | 0.080*** | 0.080*** | 0.079*** | 0.089**  | 0.089**  | 0.089**  | 0.089**  | 0.088**  | 0.061+   | 0.061+   | 0.062+   | 0.062+   | 0.061+   |
|                                                      | (0.02)   | (0.02)   | (0.02)   | (0.02)   | (0.02)   | (0.03)   | (0.03)   | (0.03)   | (0.03)   | (0.03)   | (0.03)   | (0.03)   | (0.03)   | (0.03)   | (0.03)   |
| Any Dependents                                       | -0.048+  | -0.048+  | -0.048+  | -0.048+  | -0.048+  | -0.056   | -0.056   | -0.056   | -0.056   | -0.057   | -0.033   | -0.033   | -0.033   | -0.033   | -0.033   |

|                           |          |          |          |          |          |          |          |          |          |          |          |          |          |          |          |
|---------------------------|----------|----------|----------|----------|----------|----------|----------|----------|----------|----------|----------|----------|----------|----------|----------|
|                           | (0.03)   | (0.03)   | (0.03)   | (0.03)   | (0.03)   | (0.03)   | (0.03)   | (0.03)   | (0.03)   | (0.03)   | (0.04)   | (0.04)   | (0.04)   | (0.04)   | (0.04)   |
| Self-Reported Health      | 0.266*** | 0.266*** | 0.266*** | 0.266*** | 0.266*** | 0.304*** | 0.304*** | 0.304*** | 0.303*** | 0.304*** | 0.208*** | 0.208*** | 0.209*** | 0.208*** | 0.208*** |
|                           | (0.01)   | (0.01)   | (0.01)   | (0.01)   | (0.01)   | (0.01)   | (0.01)   | (0.01)   | (0.01)   | (0.01)   | (0.01)   | (0.01)   | (0.01)   | (0.01)   | (0.01)   |
| ADLs                      | -        | -        | -        | -        | -        | -        | -        | -        | -        | -        | -        | -        | -        | -        | -        |
|                           | 0.245*** | 0.245*** | 0.245*** | 0.245*** | 0.245*** | 0.231*** | 0.231*** | 0.231*** | 0.231*** | 0.231*** | 0.270*** | 0.270*** | 0.270*** | 0.270*** | 0.270*** |
|                           | (0.01)   | (0.01)   | (0.01)   | (0.01)   | (0.01)   | (0.02)   | (0.02)   | (0.02)   | (0.02)   | (0.02)   | (0.02)   | (0.02)   | (0.02)   | (0.02)   | (0.02)   |
| IADLS                     | -        | -        | -        | -        | -        | -        | -        | -        | -        | -        | -        | -        | -        | -        | -        |
|                           | 0.164*** | 0.164*** | 0.164*** | 0.163*** | 0.164*** | 0.147*** | 0.147*** | 0.147*** | 0.147*** | 0.147*** | 0.193*** | 0.193*** | 0.193*** | 0.193*** | 0.193*** |
|                           | (0.02)   | (0.02)   | (0.02)   | (0.02)   | (0.02)   | (0.03)   | (0.03)   | (0.03)   | (0.03)   | (0.03)   | (0.04)   | (0.04)   | (0.04)   | (0.04)   | (0.04)   |
| Chronic Health Conditions | -        | -        | -        | -        | -        | -        | -        | -        | -        | -        | -        | -        | -        | -        | -        |
|                           | 0.072*** | 0.072*** | 0.072*** | 0.072*** | 0.072*** | -0.056** | -0.056** | -0.056** | -0.057** | -0.056** | 0.093*** | 0.093*** | 0.093*** | 0.093*** | 0.093*** |
|                           | (0.01)   | (0.01)   | (0.01)   | (0.01)   | (0.01)   | (0.02)   | (0.02)   | (0.02)   | (0.02)   | (0.02)   | (0.02)   | (0.02)   | (0.02)   | (0.02)   | (0.02)   |
| Income (Logged)           | 0.054*** | 0.054*** | 0.054*** | 0.054*** | 0.054*** | 0.060*** | 0.060*** | 0.060*** | 0.060*** | 0.060*** | 0.044**  | 0.044**  | 0.044**  | 0.044**  | 0.044**  |
|                           | (0.01)   | (0.01)   | (0.01)   | (0.01)   | (0.01)   | (0.01)   | (0.01)   | (0.01)   | (0.01)   | (0.01)   | (0.02)   | (0.02)   | (0.02)   | (0.02)   | (0.02)   |
| Age (ref: <60)            |          |          |          |          |          |          |          |          |          |          |          |          |          |          |          |
| 60-64                     | 0.057+   | 0.057+   | 0.057+   | 0.057+   | 0.058+   | 0.054    | 0.054    | 0.054    | 0.054    | 0.054    | 0.066    | 0.066    | 0.066    | 0.067    | 0.067    |
|                           | (0.03)   | (0.03)   | (0.03)   | (0.03)   | (0.03)   | (0.04)   | (0.04)   | (0.04)   | (0.04)   | (0.04)   | (0.04)   | (0.04)   | (0.04)   | (0.04)   | (0.04)   |
| 65-69                     | 0.119**  | 0.119**  | 0.119**  | 0.119**  | 0.120**  | 0.103+   | 0.103+   | 0.103+   | 0.103+   | 0.104+   | 0.150*   | 0.150*   | 0.150*   | 0.150*   | 0.151*   |
|                           | (0.04)   | (0.04)   | (0.04)   | (0.04)   | (0.04)   | (0.06)   | (0.06)   | (0.06)   | (0.06)   | (0.06)   | (0.06)   | (0.06)   | (0.06)   | (0.06)   | (0.06)   |
| 70-74                     | 0.091    | 0.091    | 0.091    | 0.091    | 0.092    | 0.087    | 0.087    | 0.088    | 0.087    | 0.089    | 0.112    | 0.112    | 0.113    | 0.112    | 0.113    |
|                           | (0.06)   | (0.06)   | (0.06)   | (0.06)   | (0.06)   | (0.07)   | (0.07)   | (0.07)   | (0.07)   | (0.07)   | (0.08)   | (0.08)   | (0.08)   | (0.08)   | (0.08)   |
| 75-79                     | 0.01     | 0.01     | 0.01     | 0.01     | 0.011    | 0.006    | 0.006    | 0.006    | 0.006    | 0.007    | 0.042    | 0.042    | 0.042    | 0.042    | 0.042    |
|                           | (0.07)   | (0.07)   | (0.07)   | (0.07)   | (0.07)   | (0.09)   | (0.09)   | (0.09)   | (0.09)   | (0.09)   | (0.10)   | (0.10)   | (0.10)   | (0.10)   | (0.10)   |
| 80-84                     | -0.073   | -0.073   | -0.073   | -0.073   | -0.072   | -0.032   | -0.032   | -0.032   | -0.032   | -0.031   | -0.093   | -0.093   | -0.093   | -0.093   | -0.092   |
|                           | (0.08)   | (0.08)   | (0.08)   | (0.08)   | (0.08)   | (0.11)   | (0.11)   | (0.11)   | (0.11)   | (0.11)   | (0.12)   | (0.12)   | (0.12)   | (0.12)   | (0.12)   |
| 85+                       | -0.204*  | -0.204*  | -0.204*  | -0.204*  | -0.203*  | -0.12    | -0.12    | -0.12    | -0.12    | -0.118   | -0.287+  | -0.287+  | -0.286+  | -0.287+  | -0.285+  |
|                           | (0.10)   | (0.10)   | (0.10)   | (0.10)   | (0.10)   | (0.14)   | (0.14)   | (0.14)   | (0.14)   | (0.14)   | (0.15)   | (0.15)   | (0.15)   | (0.15)   | (0.15)   |
| 2004                      | 0.093*** | 0.093*** | 0.093*** | 0.093*** | 0.092*** | 0.098*** | 0.098*** | 0.098*** | 0.099*** | 0.098*** | 0.076**  | 0.076**  | 0.076**  | 0.076**  | 0.076**  |
|                           | (0.02)   | (0.02)   | (0.02)   | (0.02)   | (0.02)   | (0.02)   | (0.02)   | (0.02)   | (0.02)   | (0.02)   | (0.03)   | (0.03)   | (0.03)   | (0.03)   | (0.03)   |
| 2006                      | 0.103*** | 0.103*** | 0.103*** | 0.103*** | 0.102*** | 0.103*** | 0.103*** | 0.103*** | 0.103*** | 0.103*** | 0.102*** | 0.091**  | 0.091**  | 0.091**  | 0.091**  |
|                           | (0.02)   | (0.02)   | (0.02)   | (0.02)   | (0.02)   | (0.03)   | (0.03)   | (0.03)   | (0.03)   | (0.03)   | (0.03)   | (0.03)   | (0.03)   | (0.03)   | (0.03)   |
| 2008                      | 0.198*** | 0.198*** | 0.198*** | 0.198*** | 0.197*** | 0.224*** | 0.224*** | 0.224*** | 0.224*** | 0.223*** | 0.141*** | 0.141*** | 0.141*** | 0.141*** | 0.140*** |
|                           | (0.03)   | (0.03)   | (0.03)   | (0.03)   | (0.03)   | (0.04)   | (0.04)   | (0.04)   | (0.04)   | (0.04)   | (0.04)   | (0.04)   | (0.04)   | (0.04)   | (0.04)   |
| 2010                      | 0.244*** | 0.244*** | 0.244*** | 0.245*** | 0.244*** | 0.252*** | 0.252*** | 0.252*** | 0.252*** | 0.251*** | 0.212*** | 0.212*** | 0.213*** | 0.213*** | 0.212*** |
|                           | (0.03)   | (0.03)   | (0.03)   | (0.03)   | (0.03)   | (0.04)   | (0.04)   | (0.04)   | (0.04)   | (0.04)   | (0.05)   | (0.05)   | (0.05)   | (0.05)   | (0.05)   |
| 2012                      | 0.242*** | 0.242*** | 0.242*** | 0.243*** | 0.241*** | 0.261*** | 0.261*** | 0.260*** | 0.261*** | 0.260*** | 0.192*** | 0.192*** | 0.192*** | 0.192*** | 0.191*** |
|                           | (0.04)   | (0.04)   | (0.04)   | (0.04)   | (0.04)   | (0.05)   | (0.05)   | (0.05)   | (0.05)   | (0.05)   | (0.06)   | (0.06)   | (0.06)   | (0.06)   | (0.06)   |
| Constant                  | 5.416*** | 5.416*** | 5.416*** | 5.416*** | 5.416*** | 5.064*** | 5.064*** | 5.064*** | 5.064*** | 5.064*** | 5.972*** | 5.972*** | 5.969*** | 5.972*** | 5.970*** |
|                           | (0.12)   | (0.12)   | (0.12)   | (0.12)   | (0.12)   | (0.15)   | (0.15)   | (0.15)   | (0.15)   | (0.15)   | (0.17)   | (0.17)   | (0.17)   | (0.17)   | (0.17)   |
| Observations              | 75929    | 75929    | 75929    | 75929    | 75929    | 46708    | 46708    | 46708    | 46708    | 46708    | 29221    | 29221    | 29221    | 29221    | 29221    |



|                           |           |           |           |           |           |          |          |          |          |          |           |           |           |           |           |
|---------------------------|-----------|-----------|-----------|-----------|-----------|----------|----------|----------|----------|----------|-----------|-----------|-----------|-----------|-----------|
|                           | (0.03)    | (0.03)    | (0.03)    | (0.03)    | (0.03)    | (0.03)   | (0.03)   | (0.03)   | (0.03)   | (0.03)   | (0.04)    | (0.04)    | (0.04)    | (0.04)    | (0.04)    |
| Chronic Health Conditions | -0.064*** | -0.064*** | -0.064*** | -0.064*** | -0.064*** | -0.050** | -0.050** | -0.050** | -0.050** | -0.050** | -0.083*** | -0.083*** | -0.083*** | -0.083*** | -0.082*** |
|                           | (0.01)    | (0.01)    | (0.01)    | (0.01)    | (0.01)    | (0.02)   | (0.02)   | (0.02)   | (0.02)   | (0.02)   | (0.02)    | (0.02)    | (0.02)    | (0.02)    | (0.02)    |
| Income (Logged)           | 0.054***  | 0.054***  | 0.054***  | 0.054***  | 0.054***  | 0.057*** | 0.057*** | 0.057*** | 0.057*** | 0.057*** | 0.050**   | 0.050**   | 0.050**   | 0.050**   | 0.050**   |
|                           | (0.01)    | (0.01)    | (0.01)    | (0.01)    | (0.01)    | (0.01)   | (0.01)   | (0.01)   | (0.01)   | (0.01)   | (0.02)    | (0.02)    | (0.02)    | (0.02)    | (0.02)    |
| 60-64                     | 0.064*    | 0.064*    | 0.064*    | 0.064*    | 0.065*    | 0.053    | 0.053    | 0.053    | 0.053    | 0.054    | 0.086+    | 0.086+    | 0.086+    | 0.086+    | 0.087+    |
|                           | (0.03)    | (0.03)    | (0.03)    | (0.03)    | (0.03)    | (0.04)   | (0.04)   | (0.04)   | (0.04)   | (0.04)   | (0.05)    | (0.05)    | (0.05)    | (0.05)    | (0.05)    |
| 65-69                     | 0.127**   | 0.127**   | 0.127**   | 0.127**   | 0.128**   | 0.101+   | 0.101+   | 0.101+   | 0.101+   | 0.102+   | 0.177**   | 0.177**   | 0.178**   | 0.178**   | 0.178**   |
|                           | (0.05)    | (0.05)    | (0.05)    | (0.05)    | (0.05)    | (0.06)   | (0.06)   | (0.06)   | (0.06)   | (0.06)   | (0.07)    | (0.07)    | (0.07)    | (0.07)    | (0.07)    |
| 70-74                     | 0.101+    | 0.101+    | 0.101+    | 0.101+    | 0.102+    | 0.086    | 0.086    | 0.086    | 0.086    | 0.087    | 0.145+    | 0.145+    | 0.146+    | 0.145+    | 0.146+    |
|                           | (0.06)    | (0.06)    | (0.06)    | (0.06)    | (0.06)    | (0.08)   | (0.08)   | (0.08)   | (0.08)   | (0.08)   | (0.09)    | (0.09)    | (0.09)    | (0.09)    | (0.09)    |
| 75-79                     | 0.019     | 0.019     | 0.019     | 0.019     | 0.019     | 0.001    | 0.001    | 0.001    | 0.001    | 0.002    | 0.078     | 0.078     | 0.079     | 0.078     | 0.079     |
|                           | (0.07)    | (0.07)    | (0.07)    | (0.07)    | (0.07)    | (0.10)   | (0.10)   | (0.10)   | (0.10)   | (0.10)   | (0.11)    | (0.11)    | (0.11)    | (0.11)    | (0.11)    |
| 80-84                     | -0.054    | -0.054    | -0.055    | -0.054    | -0.053    | -0.032   | -0.032   | -0.032   | -0.032   | -0.031   | -0.036    | -0.036    | -0.035    | -0.036    | -0.035    |
|                           | (0.09)    | (0.09)    | (0.09)    | (0.09)    | (0.09)    | (0.12)   | (0.12)   | (0.12)   | (0.12)   | (0.12)   | (0.13)    | (0.13)    | (0.13)    | (0.13)    | (0.13)    |
| 85+                       | -0.190+   | -0.190+   | -0.190+   | -0.190+   | -0.188+   | -0.132   | -0.132   | -0.132   | -0.132   | -0.131   | -0.22     | -0.22     | -0.22     | -0.221    | -0.219    |
|                           | (0.10)    | (0.10)    | (0.10)    | (0.10)    | (0.10)    | (0.14)   | (0.14)   | (0.14)   | (0.14)   | (0.14)   | (0.15)    | (0.15)    | (0.15)    | (0.15)    | (0.15)    |
| 2004                      | 0.109***  | 0.109***  | 0.109***  | 0.109***  | 0.108***  | 0.113*** | 0.113*** | 0.112*** | 0.113*** | 0.112*** | 0.095***  | 0.095***  | 0.095***  | 0.095***  | 0.094***  |
|                           | (0.02)    | (0.02)    | (0.02)    | (0.02)    | (0.02)    | (0.03)   | (0.03)   | (0.03)   | (0.03)   | (0.03)   | (0.03)    | (0.03)    | (0.03)    | (0.03)    | (0.03)    |
| 2006                      | 0.105***  | 0.105***  | 0.105***  | 0.105***  | 0.105***  | 0.106*** | 0.106*** | 0.106*** | 0.106*** | 0.106*** | 0.091**   | 0.090**   | 0.090**   | 0.090**   | 0.090**   |
|                           | (0.02)    | (0.02)    | (0.02)    | (0.02)    | (0.02)    | (0.03)   | (0.03)   | (0.03)   | (0.03)   | (0.03)   | (0.03)    | (0.03)    | (0.03)    | (0.03)    | (0.03)    |
| 2008                      | 0.197***  | 0.197***  | 0.197***  | 0.197***  | 0.196***  | 0.228*** | 0.228*** | 0.228*** | 0.229*** | 0.227*** | 0.129**   | 0.129**   | 0.129**   | 0.129**   | 0.128**   |
|                           | (0.03)    | (0.03)    | (0.03)    | (0.03)    | (0.03)    | (0.04)   | (0.04)   | (0.04)   | (0.04)   | (0.04)   | (0.04)    | (0.04)    | (0.04)    | (0.04)    | (0.04)    |
| 2010                      | 0.233***  | 0.233***  | 0.233***  | 0.234***  | 0.233***  | 0.237*** | 0.237*** | 0.237*** | 0.237*** | 0.237*** | 0.236***  | 0.206***  | 0.206***  | 0.206***  | 0.207***  |
|                           | (0.03)    | (0.03)    | (0.03)    | (0.03)    | (0.03)    | (0.04)   | (0.04)   | (0.04)   | (0.04)   | (0.04)   | (0.04)    | (0.05)    | (0.05)    | (0.05)    | (0.05)    |
| 2012                      | 0.248***  | 0.248***  | 0.248***  | 0.248***  | 0.247***  | 0.278*** | 0.278*** | 0.278*** | 0.279*** | 0.277*** | 0.172**   | 0.172**   | 0.173**   | 0.172**   | 0.171**   |
|                           | (0.04)    | (0.04)    | (0.04)    | (0.04)    | (0.04)    | (0.05)   | (0.05)   | (0.05)   | (0.05)   | (0.05)   | (0.06)    | (0.06)    | (0.06)    | (0.06)    | (0.06)    |
| Constant                  | 5.440***  | 5.440***  | 5.440***  | 5.440***  | 5.440***  | 5.135*** | 5.135*** | 5.135*** | 5.135*** | 5.135*** | 5.918***  | 5.918***  | 5.914***  | 5.918***  | 5.916***  |
|                           | (0.12)    | (0.12)    | (0.12)    | (0.12)    | (0.12)    | (0.16)   | (0.16)   | (0.16)   | (0.16)   | (0.16)   | (0.18)    | (0.18)    | (0.18)    | (0.18)    | (0.18)    |
| Observations              | 66025     | 66025     | 66025     | 66025     | 66025     | 41104    | 41104    | 41104    | 41104    | 41104    | 24921     | 24921     | 24921     | 24921     | 24921     |

Notes: These models are the same as those presented in Table 3 and Table A4, however, the interaction terms here have been demeaned as well. The double demeaning approach demeans the product (interaction) of already-demeaned factor variables. The results presented here are similar to those presented in the paper. The single demeaning approach I employ earlier produces smaller standard errors and maintains a larger sample size. The double demeaning approach here requires individuals to appear at least three times in the sample, which reduces the sample size, and produces larger standard errors.
